# Supplementary material
Source: PubMed Central journal article supplement (PMC2000422)

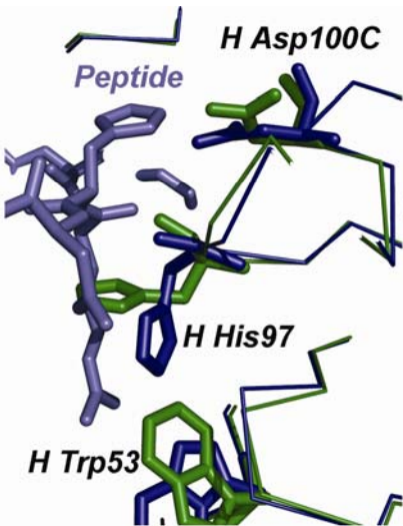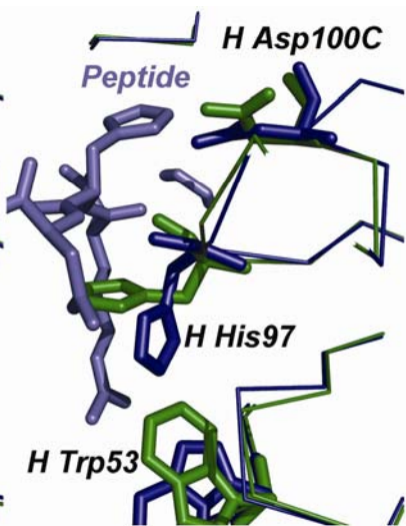

Supplement: pnas_0705888104_1.pdf [file pnas_0705888104_1.pdf]

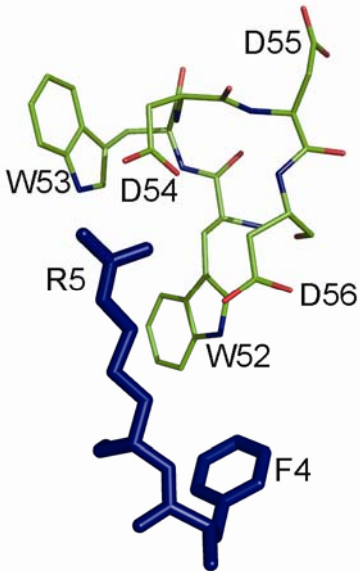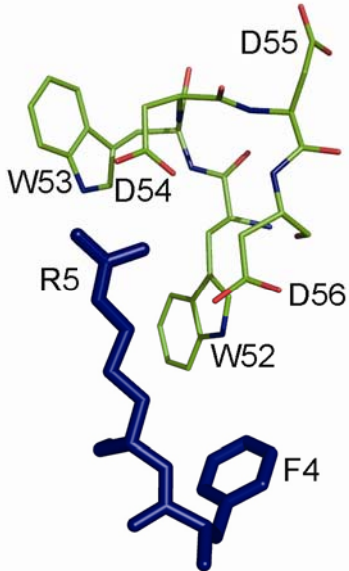

Supplement: pnas_0705888104_2.pdf [file pnas_0705888104_2.pdf]

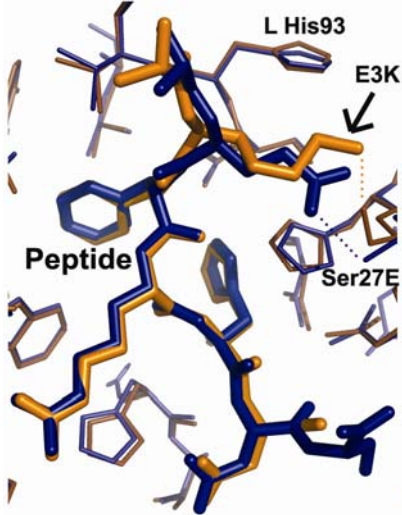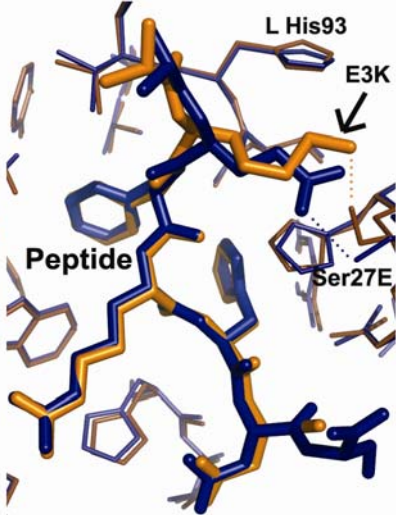

Supplement: pnas_0705888104_3.pdf [file pnas_0705888104_3.pdf]
